# Supplementary material
Source: publisher figshare collection journal article supplement (https://acs.figshare.com/ndownloader/files/4170658)
Supplement: Supplementary file 1 [file 4170658]

# Thermodynamic and Kinetic Stabilities of Active Site Protonation States of a Class C $\beta$ -Lactamase

Ravi Tripathi and Nisanth N. Nair

*Department of Chemistry Indian Institute of Technology Kanpur, Kanpur, India*

## Supporting Information

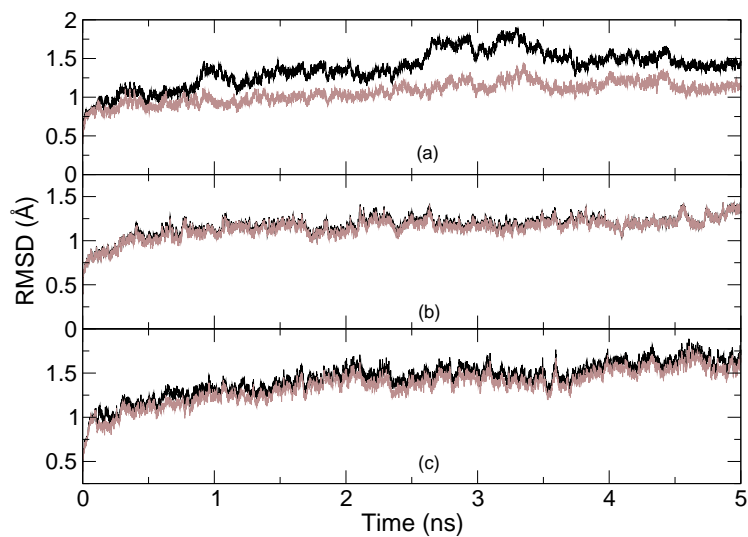

FigSI 1: RMSD of the protein backbone with respect to the starting structure of the *NVT* simulation during the empirical force field based MD simulation for (a) **Lys315+**, (b) **Tyr150-**, and (c) **Lys67+** protonation states. Black line indicates the RMSD of whole protein whereas brown line is for residues 5-361.

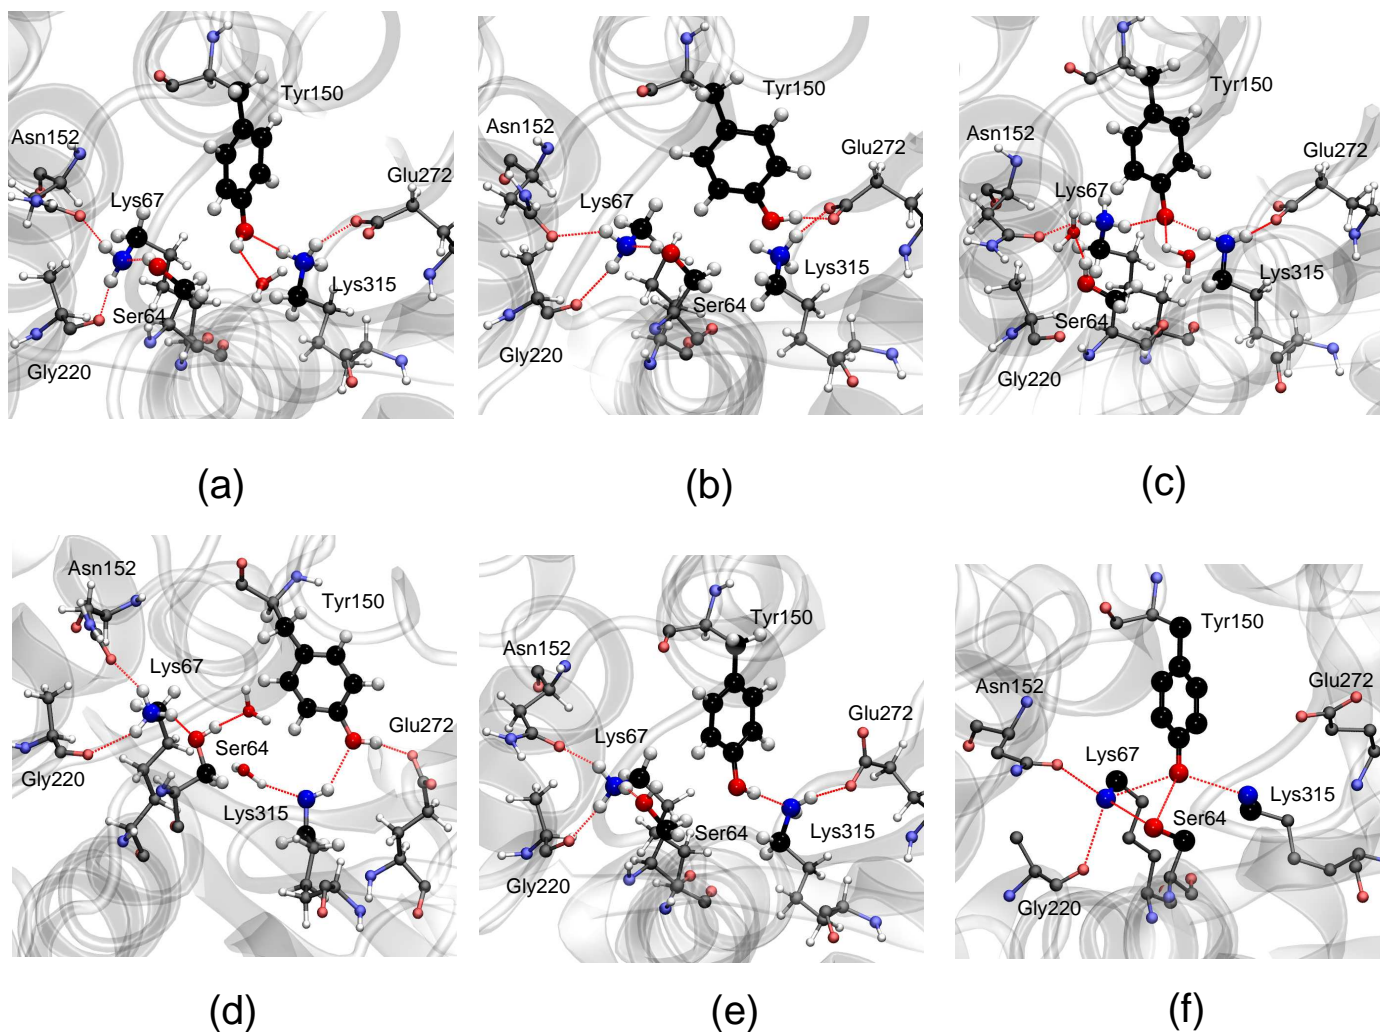

FigSI 2: Average active site structures after *NVT* simulation using empirical force field (a-e) and X-ray crystallographic structure (f). Structures are labeled as (a) **Lys315+**, (b) **Lys315+A**, (c) **Tyr150-**, (d) **Lys67+** (e) **Lys67+A**; see also Figure 5 of the manuscript.

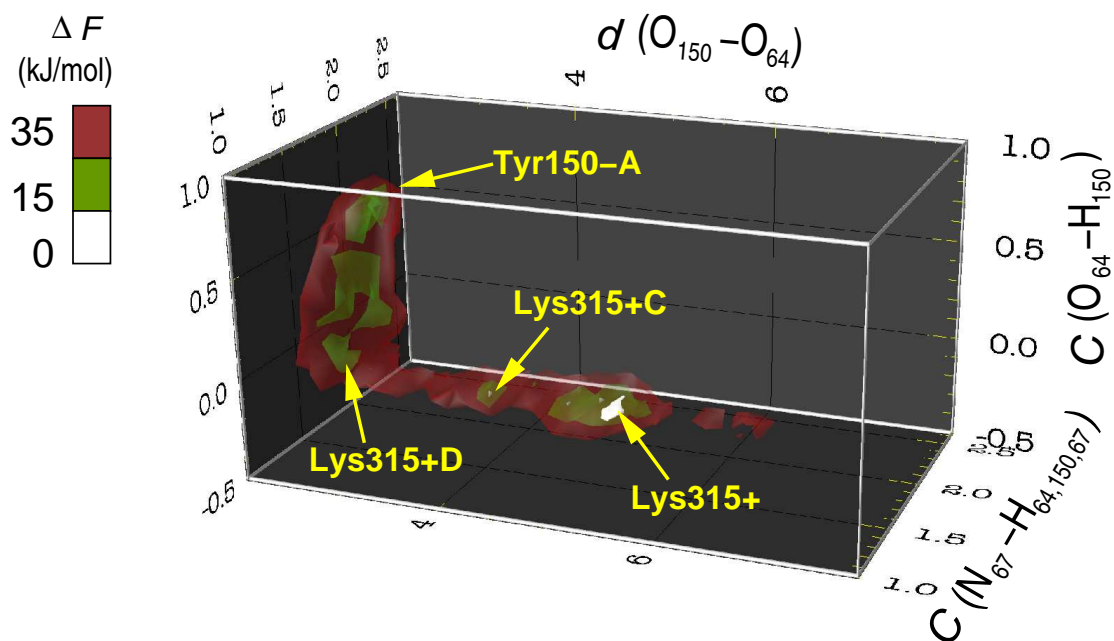

FigSI 3: Four dimensional reconstructed free energy surface for the reaction **Lys315+** → **Tyr150-A**, visualized as a volumetric data for selected isovalues. See Figure 10 of the manuscript for other further details.

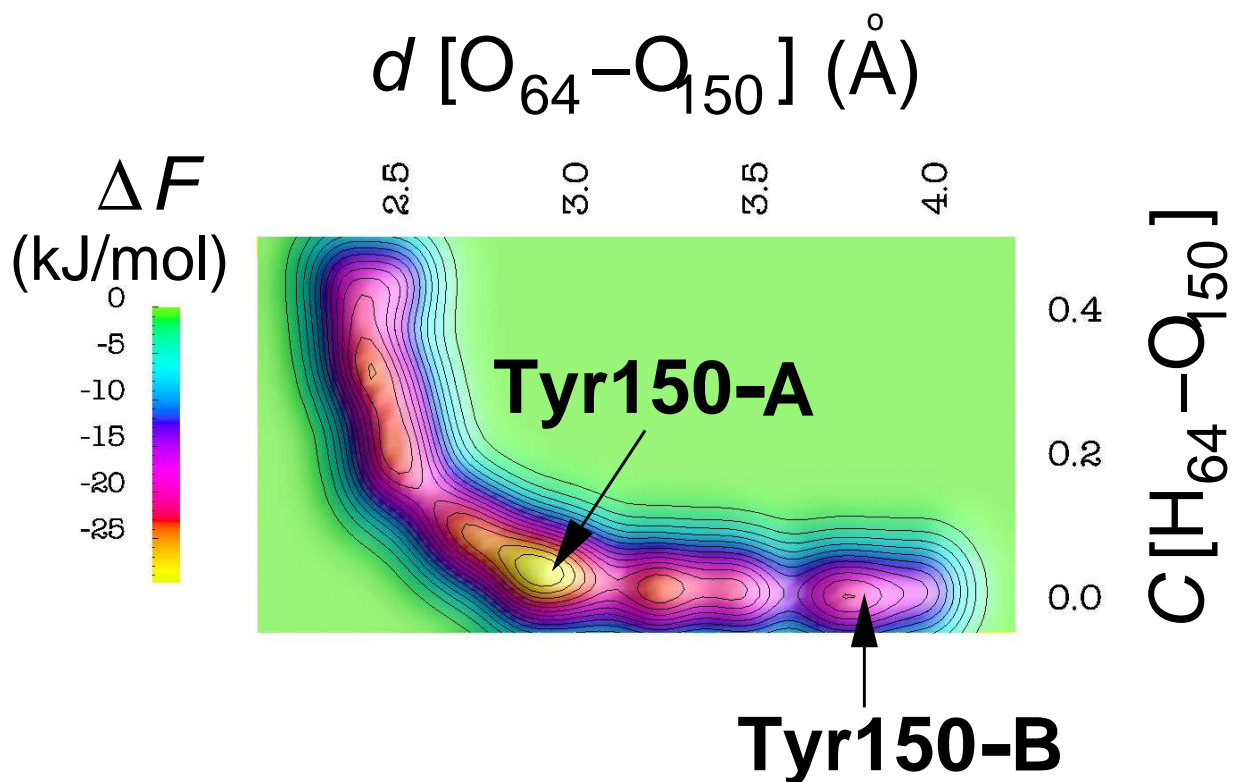

FigSI 4: Four dimensional reconstructed free energy surface for the conversion of **Tyr150-A** to **Tyr150-B** is visualized here as three dimensional surface by making a cut at  $d[\text{O}_{64} - \text{N}_{67}] = 2.70 \text{ \AA}$ . See Figure 10 of the manuscript for further details.

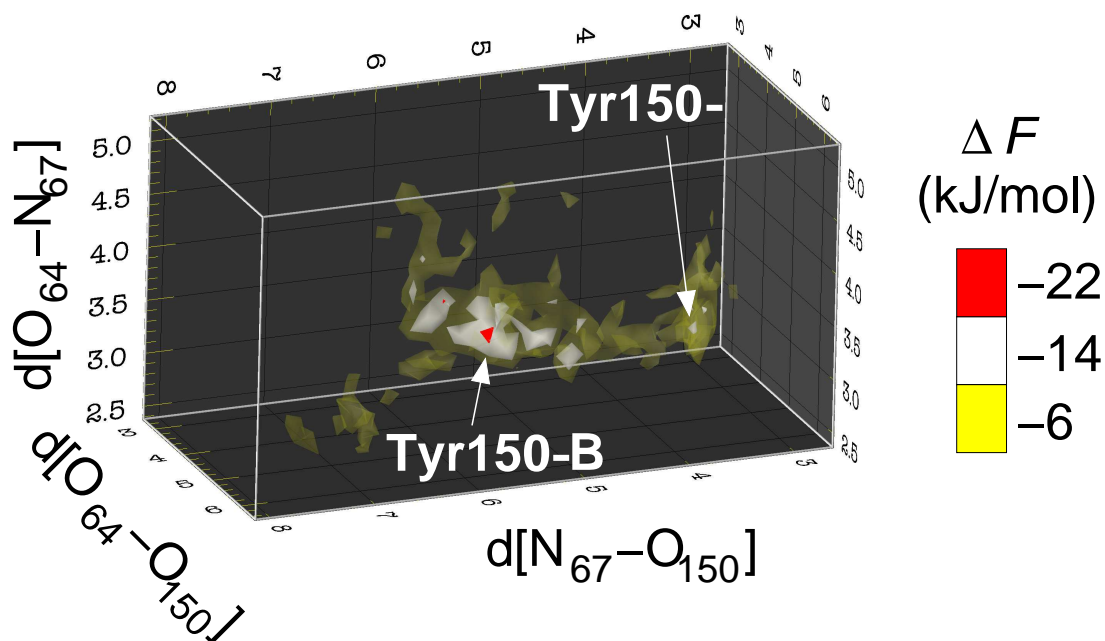

FigSI 5: Five dimensional reconstructed free energy surface for the conversion of **Tyr150-B** to **Tyr150-** is visualized here as volumetric data for the cut at  $d[\text{O}_{152} - \text{N}_{67}] = 2.84 \text{ \AA}$ , for selected isovalues. All the three coordinates are in Å. See Figure 10 of the manuscript for further details.

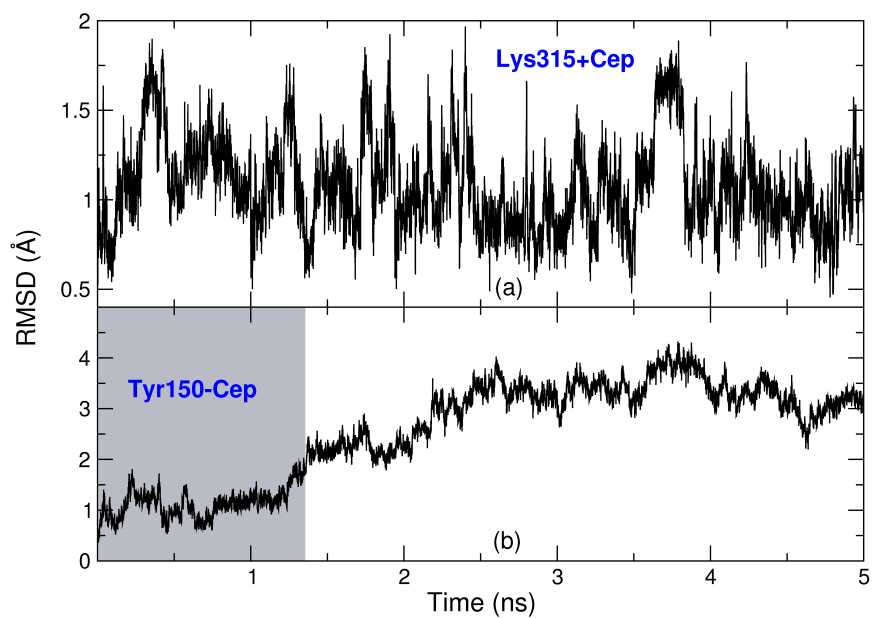

FigSI 6: RMSD of the active site including cephalothin with respect to the starting structure of the *NVT* simulation during the empirical force field based MD simulation for (a) **Lys315+Cep**, (b) **Tyr150-Cep** protonation states.

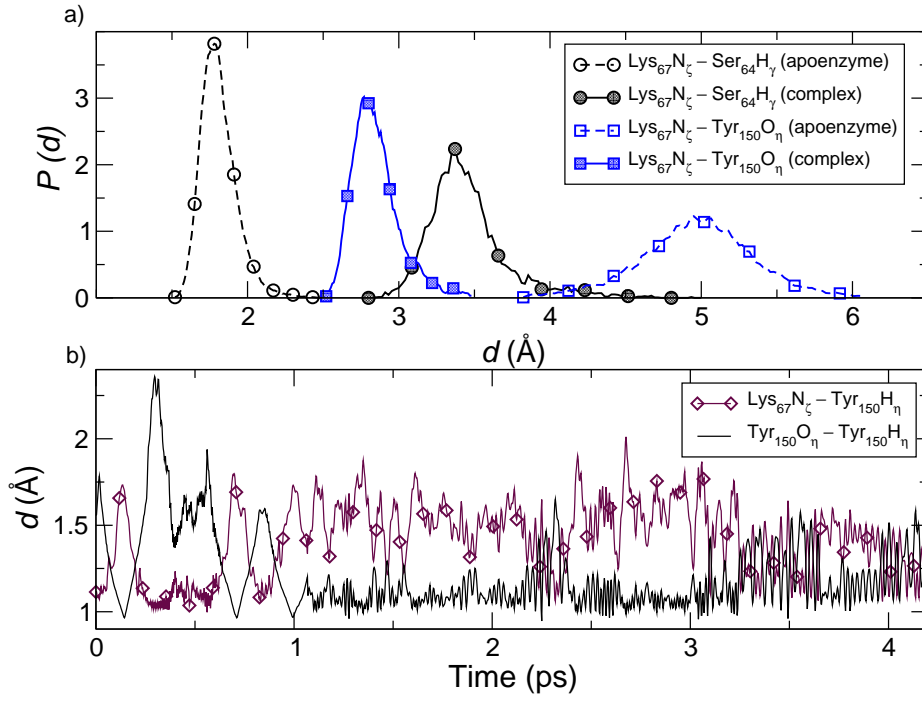

FigSI 7: (a) Distribution of selected distances during the empirical force field simulation for **Lys315+** (dotted line) and **Lys315+Cep** (solid line) protonation state. (b) The distance between  $\text{Lys}_{67}\text{N}_{\zeta} \cdots \text{Tyr}_{150}\text{H}_{\eta}$  (diamond) and  $\text{Tyr}_{150}\text{O}_{\eta} \cdots \text{Tyr}_{150}\text{H}_{\eta}$  during the QM/MM canonical ensemble simulation of **Lys315+Cep** protonation state.
